# Supplementary material
Source: PubMed Central journal article supplement (PMC4785818)
Supplement: NIHMS742833-supplement-01.pdf [file NIHMS742833-supplement-01.pdf]

**Supplemental Table 1. Rates of Progression to Higher APRI and FIB-4 Levels among HIV Infected Youth During Follow-up**

| Marker<br>Threshold | CD4<br>Level | # with                    |  | Person<br>-years | Incidence Rate<br>per 100 p-year | Incidence Rate               |         |
|---------------------|--------------|---------------------------|--|------------------|----------------------------------|------------------------------|---------|
|                     |              | progression/<br># at risk |  |                  |                                  | Ratio vs Higher<br>CD4 Level | P-value |
| APRI > 0.5          | Overall      | 176/1116                  |  | 2347             | 7.5 (5.4, 8.7)                   | ---                          | ---     |
|                     | <350         | 71/275                    |  | 571              | 12.4 (9.8, 15.7)                 | 2.14 (1.58, 2.90)            | <0.001  |
|                     | ≥350         | 101/823                   |  | 1742             | 5.8 (4.8, 7.0)                   | 1.00 (ref)                   | ---     |
| APRI > 1.5          | Overall      | 39/1256                   |  | 2823             | 1.4 (1.0, 1.9)                   | ---                          | ---     |
|                     | <350         | 23/344                    |  | 790              | 2.9 (1.9, 4.4)                   | 3.62 (1.91, 6.85)            | <0.001  |
|                     | ≥350         | 16/891                    |  | 1991             | 0.8 (0.5, 1.3)                   | 1.00 (ref)                   | ---     |
| FIB-4 > 1.5         | Overall      | 46/1257                   |  | 2822             | 1.6 (1.2, 2.2)                   | ---                          | ---     |
|                     | <350         | 28/348                    |  | 797              | 3.5 (2.5, 4.1)                   | 3.87 (2.14, 7.00)            | <0.001  |
|                     | ≥350         | 18/888                    |  | 1984             | 0.9 (0.6, 1.4)                   | 1.00 (ref)                   | ---     |
| FIB-4 > 3.25        | Overall      | 9/1266                    |  | 2871             | 0.3 (0.2, 0.6)                   | ---                          | ---     |
|                     | <350         | 6/350                     |  | 819              | 0.7 (0.3, 1.6)                   | 7.35 (1.48, 36.42)           | 0.014   |
|                     | ≥350         | 2/894                     |  | 2007             | 0.1 (0.0, 0.4)                   | 1.00 (ref)                   | ---     |

**Supplemental Table 2. Cox proportional hazards models for risk of AIDS progression or death by levels of liver biomarkers at first assessment when aged 15 to 20 years**

| Liver Biomarker  | Unadjusted Models* |         | Adjusted Model**   |         |
|------------------|--------------------|---------|--------------------|---------|
|                  | HR (95% CI)        | P-value | HR (95% CI)        | P-value |
| FIB-4 categories |                    |         |                    |         |
| 0-0.3            | 1.00 (ref)         | ---     | 1.00 (ref)         | ---     |
| 0.3-0.4          | 1.12 ( 0.55, 2.29) | 0.76    | 0.90 ( 0.41, 1.99) | 0.80    |
| 0.4-0.5          | 1.44 ( 0.69, 3.02) | 0.34    | 0.88 ( 0.39, 1.97) | 0.76    |
| >0.5             | 2.41 ( 1.28, 4.51) | 0.006   | 1.23 ( 0.62, 2.45) | 0.56    |
| p, Trend         |                    | 0.002   |                    | 0.49    |
| Log(FIB-4)       | 2.26 ( 1.50, 3.41) | <0.001  | 1.17 ( 0.66, 2.08) | 0.58    |
| APRI categories  |                    |         |                    |         |
| 0-0.15           | 1.00 (ref)         | ---     |                    | ---     |
| 0.15-0.25        | 1.05 ( 0.44, 2.50) | 0.91    | 0.72 ( 0.29, 1.77) | 0.47    |
| 0.25-0.35        | 1.43 ( 0.60, 3.43) | 0.42    | 0.80 ( 0.32, 2.00) | 0.64    |
| >0.35            | 2.56 ( 1.13, 5.79) | 0.025   | 1.00 ( 0.42, 2.35) | 0.99    |
| p, Trend         |                    | 0.001   |                    | 0.60    |
| Log(APRI)        | 1.88 ( 1.39, 2.55) | <0.001  | 1.19 ( 0.78, 1.83) | 0.42    |

HR=hazard ratio, CI=confidence interval

\*Two separate models were fit for each liver biomarker, to evaluate trends in risk with increasing levels of liver biomarkers (categories) and to evaluate trends with each 1 unit increase in log-transformed biomarker.

\*\*Adjusted models include BMI Z-score, low CD4 count, high viral load, and treatment with HAART including a protease inhibitor.
